# Supplementary material
Source: PubMed Central journal article supplement (PMC3183898)
Supplement: hdy201094x1.pdf [file hdy201094x1.pdf]

## Supplementary Materials

**Table S1** GenBank accession numbers of *COI-COII* and *EF-1 $\alpha$*  sequences of *Samia cynthia* subspecies and two outgroup species, *Bombyx mori* and *Antheraea pernyi*, used for the construction of neighbour-joining trees.

| Species/subspecies              | Accession No.   |                                |
|---------------------------------|-----------------|--------------------------------|
|                                 | <i>COI-COII</i> | <i>EF-1<math>\alpha</math></i> |
| <i>Bombyx mori</i>              | AY048187        | D13338                         |
| <i>Antheraea pernyi</i>         | AY242996        | FJ788508                       |
| <i>S. c. ricini</i>             | AB558964        | AB558961                       |
| <i>S. c. walkeri</i>            | AB558962        | AB558959                       |
| <i>S. cynthia</i> subsp. indet. | AB558963        | AB558960                       |

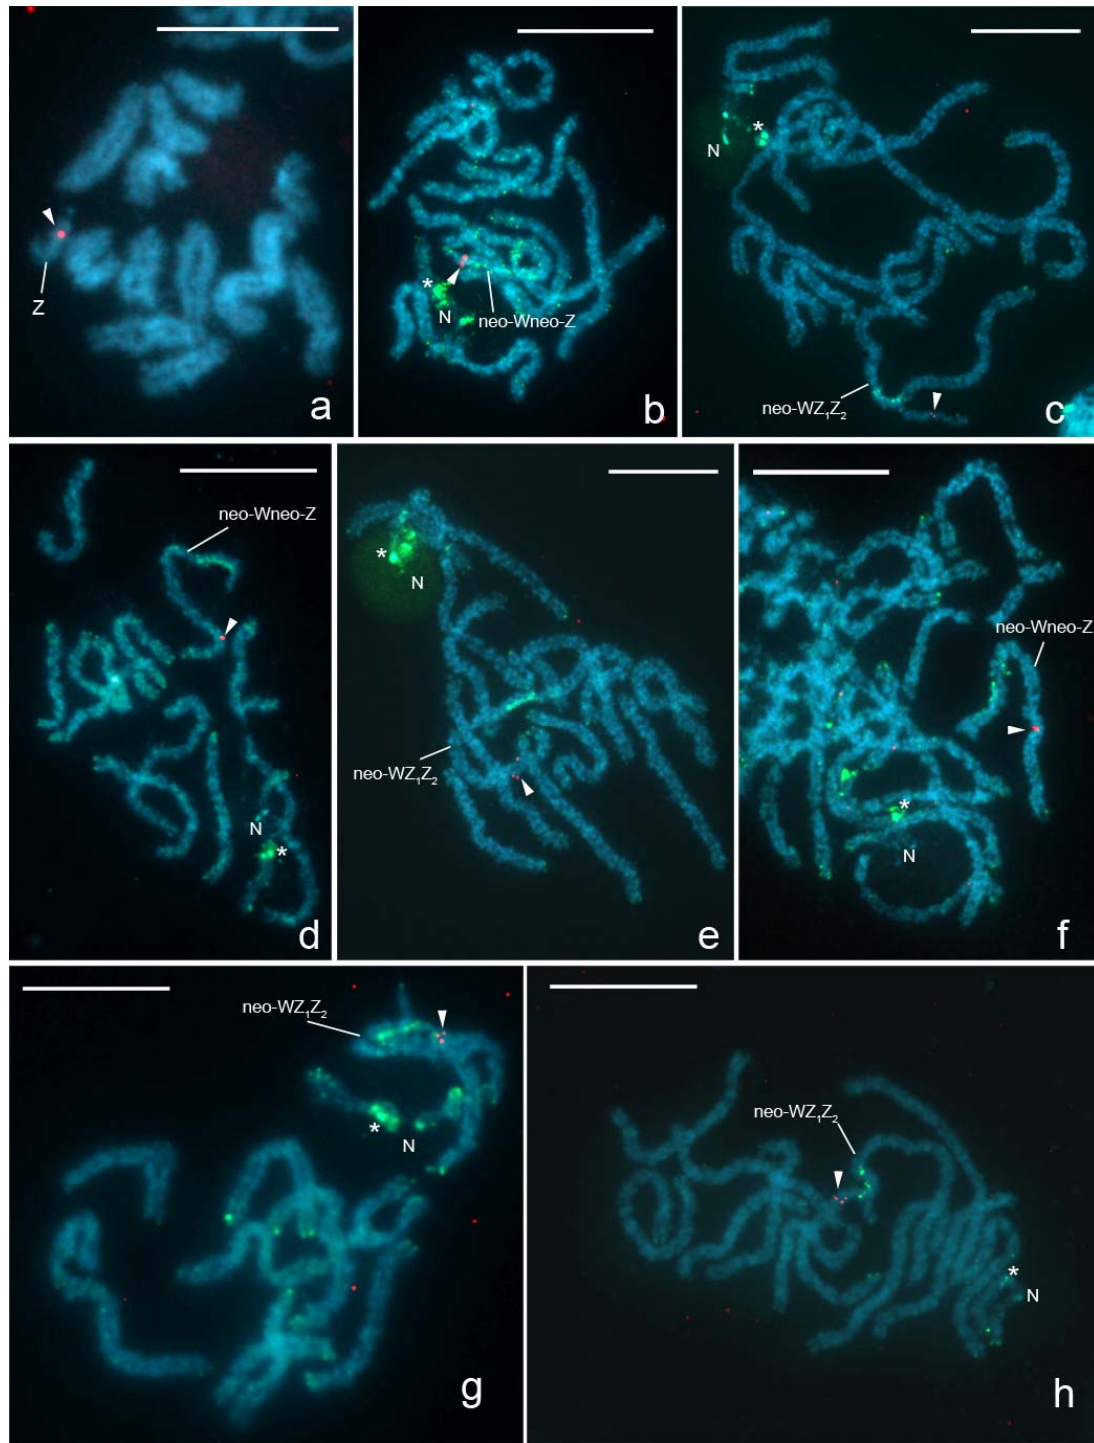

**Figure S1** FISH mapping of *S. cynthia* orthologues of *B. mori* genes on female pachytene chromosomes of *S. c. ricini* (a), *S. c. walkeri* (b, d, f), and *S. cynthia* subsp. indet. (c, e, g, h). Images in a-c, d-f, and g-h show the whole oocyte complements from the same FISH experiments as presented in Figure 1f-h, Figure 2b-d, and Figure 3b-c, respectively, showing only sex chromosomes. Red signals (arrowheads) are Cy3-labelled orthologous probes of the *B. mori* genes: *kettin* (a-c), *XDH 1* (d, e), *lysozyme* (f), *Topo II* (g), and *RpL18* (h). Green-labelled female genomic probe (green signals) identified the original W compartment and also highlighted a heterochromatin block on the NOR bivalent (asterisk) in *S. c. walkeri* (b, d, f) and *S. cynthia* subsp. indet. (c, e, g, h). Chromosomes were counterstained with DAPI (light blue). N, nucleous. Bars represent 10  $\mu$ m.

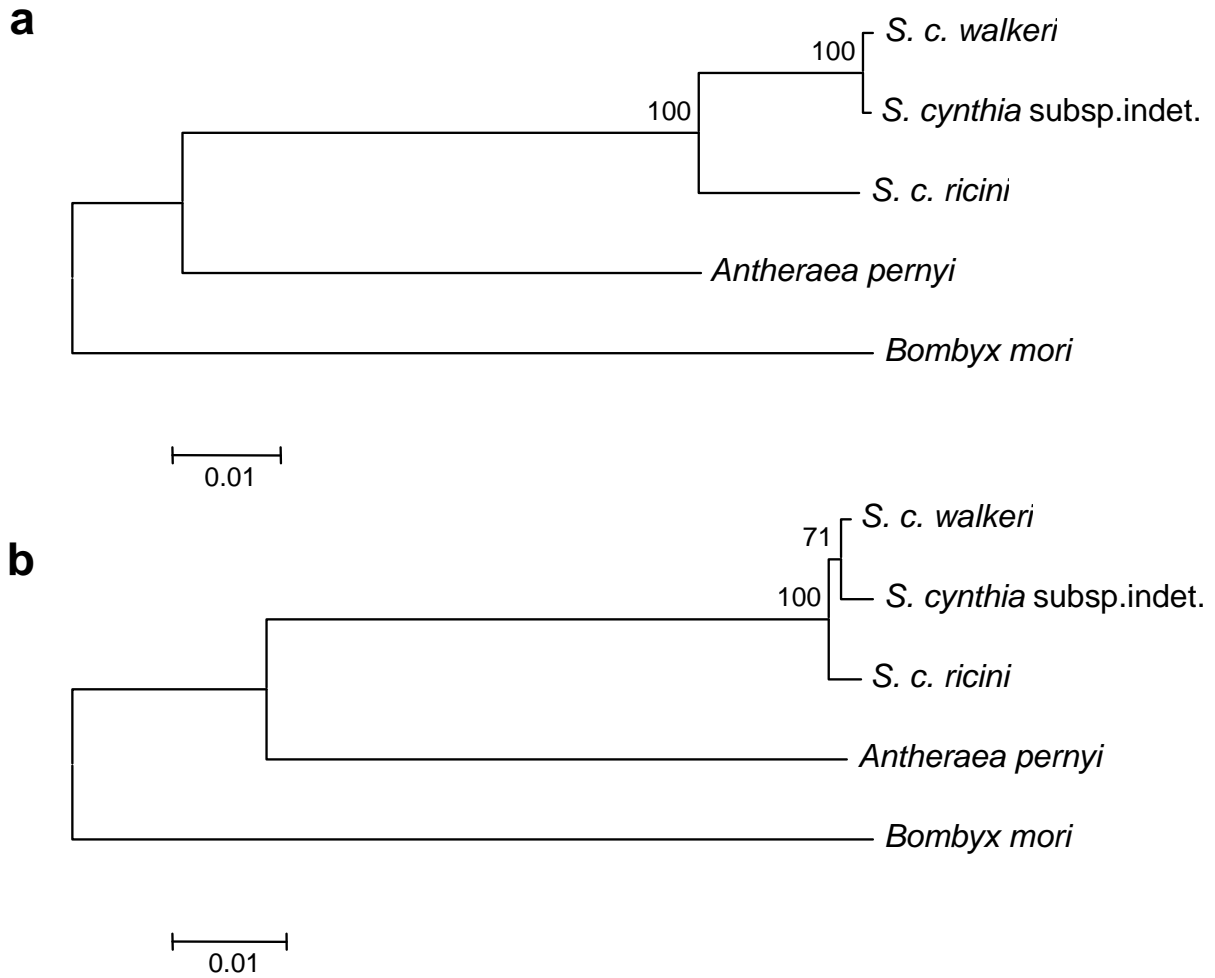

**Figure S2** Neighbour-joining trees showing evolutionary relationships of three geographical subspecies of wild silkmoths, *Samia cynthia* ssp. (Saturniidae), constructed with the use of mitochondrial DNA (*COI-COII*) (a) and a nuclear gene (*EF-1 $\alpha$* ) (b). The domesticated silkworm, *Bombyx mori* (Bombycidae), and the Chinese oak silkworm, *Antheraea pernyi* (Saturniidae), were used as outgroups. Scales indicate the number of base substitutions per site, computed with the maximum composite likelihood method. The bootstrap values (1000 replicates) are shown next to the branches.
